# Supplementary material
Source: PubMed Central journal article supplement (PMC3583536)
Supplement: NIHMS362774-supplement-supplement_1.pdf [file NIHMS362774-supplement-supplement_1.pdf]

# Supplemental Figure 1

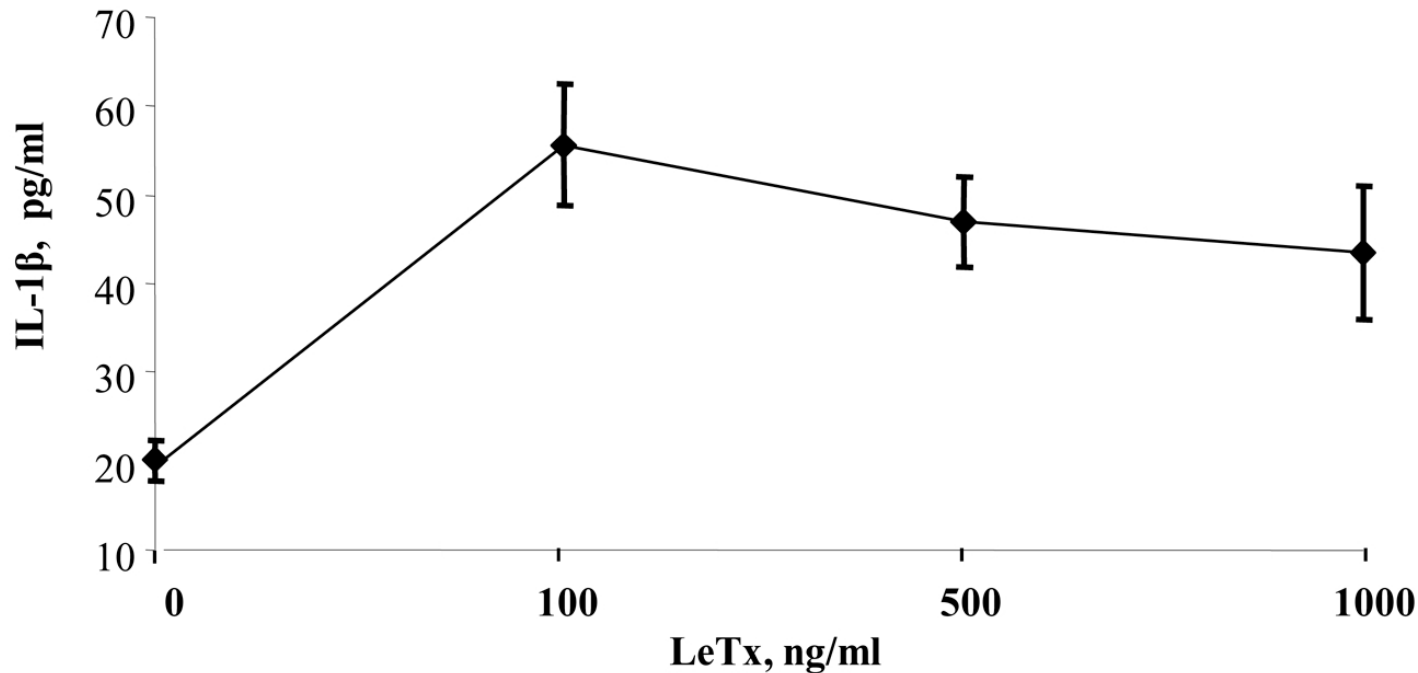

**Supplemental Figure 1: Dose response of LeTx-induced IL-1 $\beta$  release in MH-S cells.** MH-S cell cultures were treated with increasing concentrations of LeTx as shown (0, 100, 500, 1000ng/ml). Released IL-1 $\beta$  was measured by ELISA (R&D Systems, Minneapolis, MN) in duplicates following 5hr treatment. Each value represents the mean  $\pm$  SEM of data from three experiments done with duplicate macrophage cell cultures on three separate days.
